# Supplementary material
Source: PubMed Central journal article supplement (PMC4427911)
Supplement: NIHMS680222-supplement-supplement_1.pdf [file NIHMS680222-supplement-supplement_1.pdf]

## Supplementary table 1: Primers use for quantitative real-time polymerase chain reaction

### Uptake and metabolism of fructose by rat neocortical cells in vivo and by isolated nerve terminals in vitro

Bjørnar Hassel<sup>1,2</sup>, Ahmed Elsaï<sup>1</sup>, Anne Sofie Frøland<sup>1</sup>, Erik Taubøll<sup>1</sup>, Leif Gjerstad<sup>1</sup>, Yi Quan<sup>3</sup>, Ray Dingle<sup>3</sup>, Frode Rise<sup>4</sup>

1: Department of Neurology, Oslo University Hospital, Rikshospitalet, Oslo, Norway

2: Norwegian Defence Research Establishment, Kjeller, Norway

3: Department of Pharmacology, Emory University, Atlanta, GA, USA

4: Institute of Chemistry, University of Oslo, Oslo, Norway

| Genes         | Forward primer           | Reverse primer          |
|---------------|--------------------------|-------------------------|
| HPRT1         | ggtccattcctatgactgtagat  | caatcaagacggtctttccagtt |
| $\beta$ ACTIN | ccaaccgtgaaaagatgacc     | accagaggcatacagggaca    |
| GAPDH         | ggtgaaggctcgggtggaac     | ccttgactgtgccgttgaa     |
| HK1           | gaactgtcacaaagtgtaccg    | cgaagggtctcctctgagc     |
| KHK           | gtgtggatgtgtctcaagtgg    | gacacatctggcaggttcg     |
| GLUT5         | tggagtggttcctcagctct     | agtcagaccaggaggattg     |
| GLUT3         | tgacgatttctctgttactgaagg | agccacaataaaccagggaaat  |
| GLUT1         | accctgcatctcattggtct     | ggccacgatactcagataggac  |

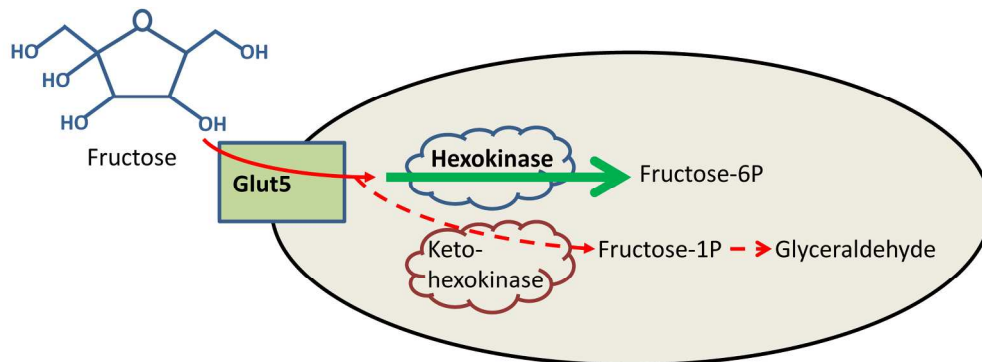

20  
21  
22  
23

### Uptake and metabolism of fructose by rat neocortical cells in vivo and by isolated nerve terminals in vitro

Bjørnar Hassel, Ahmed Elsaï, Anne Sofie Frøland, Erik Taubøll, Leif Gjerstad, Yi Quan, Ray Dingleline, Frode Rise

24  
25  
26  
27  
28  
29

We asked how the brain handles fructose, which may react spontaneously with proteins to form 'advanced glycation end products' and trigger inflammation. Neocortical cells took up and metabolized extracellular fructose oxidatively in vivo, and isolated nerve terminals did so in vitro. The low expression of fructose transporter Glut5 limited uptake of extracellular fructose. Hexokinase was a main pathway for fructose metabolism, but ketohexokinase (which leads to glyceraldehyde formation) was expressed too. Neocortical cells also took up and metabolized glyceraldehyde oxidatively.

30  
31  
32  
33  
34  
35  
36  
37  
38  
39  
40  
41  
42  
43  
44  
45  
46  
47  
48  
49  
50  
51  
52  
53  
54  
55  
56  
57  
58  
59  
60

192x69mm (300 x 300 DPI)

Review
